# Supplementary material for: Analysing the Cyanobacterial PipX Interaction Network Using NanoBiT Complementation in Synechococcus elongatus PCC7942
Source: MDPI journal article supplement (doi:10.3390/ijms25094702), 2024-04-25
Supplement: s1 [file s1]

**Table S2.** Bioluminescence values for the indicated strains and conditions. Number of biological replicates are indicated (X). nd = no data.

|                              | Time (min)      | Nitrogen source              |                              |               |
|------------------------------|-----------------|------------------------------|------------------------------|---------------|
|                              |                 | NH <sub>4</sub> <sup>+</sup> | NO <sub>3</sub> <sup>-</sup> | -N            |
| PipX-PII ( <i>pipXglnB</i> ) | Pre-culture (5) |                              | 10190 ± 949                  |               |
|                              | 0 (5)           | 20578 ± 5687                 | 20423 ± 4903                 | 21857 ± 3644  |
|                              | 15 (5)          | 11376 ± 3927                 | 9908 ± 3191                  | 9166 ± 3052   |
|                              | 30 (1)          | 14556                        | 8565                         | 3716          |
|                              | 45 (5)          | 71172 ± 19042                | 57328 ± 26704                | 30305 ± 10466 |
|                              | 60 (5)          | 80765 ± 21748                | 48768 ± 22756                | 19155 ± 13107 |
|                              | 120 (5)         | 64529 ± 18988                | 34561 ± 18267                | 10025 ± 3702  |
|                              | 180 (5)         | 46249 ± 14341                | 26102 ± 12850                | 8037 ± 3738   |
|                              | 240 (5)         | 41024 ± 14048                | 26048 ± 8263                 | 7448 ± 3418   |
| PipX-NtcA ( <i>pipX</i> )    | Pre-culture (3) |                              | 4811 ± 1364                  |               |
|                              | 0 (3)           | 822 ± 50                     | 671 ± 213                    | 702 ± 208     |
|                              | 15 (3)          | 783 ± 92                     | 922 ± 322                    | 753 ± 118     |
|                              | 30              | nd                           | nd                           | nd            |
|                              | 45 (3)          | 873 ± 116                    | 2518 ± 408                   | 2168 ± 727    |
|                              | 60 (3)          | 610 ± 291                    | 4029 ± 1134                  | 5284 ± 877    |
|                              | 120 (3)         | 733 ± 60                     | 922 ± 58                     | 3011 ± 1117   |
|                              | 180 (3)         | 778 ± 160                    | 1065 ± 239                   | 3726 ± 1695   |
|                              | 240 (3)         | 994 ± 277                    | 1906 ± 434                   | 3290 ± 1462   |
| PipX ( <i>pipX</i> )         | Pre-culture (3) |                              | 492 ± 134                    |               |
|                              | 0 (3)           | 892 ± 507                    | 1216 ± 354                   | 1045 ± 429    |
|                              | 15 (3)          | 945 ± 213                    | 1128 ± 328                   | 1071 ± 283    |
|                              | 30              | nd                           | nd                           | nd            |
|                              | 45 (3)          | 520 ± 151                    | 956 ± 199                    | 917 ± 406     |
|                              | 60 (3)          | 640 ± 308                    | 1037 ± 231                   | 777 ± 441     |
|                              | 120 (3)         | 844 ± 406                    | 980 ± 308                    | 804 ± 223     |
|                              | 180 (3)         | 783 ± 238                    | 1049 ± 381                   | 565 ± 215     |
|                              | 240 (3)         | 808 ± 194                    | 1015 ± 332                   | 612 ± 234     |
| PipX ( <i>pipXglnB</i> )     | Pre-culture (3) |                              | 404 ± 106                    |               |
|                              | 0 (3)           | 742 ± 216                    | 1046 ± 307                   | 984 ± 293     |
|                              | 15 (3)          | 693 ± 57                     | 760 ± 25                     | 802 ± 137     |
|                              | 30              | nd                           | nd                           | nd            |
|                              | 45 (3)          | 871 ± 108                    | 885 ± 376                    | 1012 ± 522    |
|                              | 60 (3)          | 896 ± 121                    | 828 ± 215                    | 1259 ± 171    |
|                              | 120 (3)         | 1334 ± 301                   | 1128 ± 154                   | 750 ± 6       |
|                              | 180 (3)         | 787 ± 168                    | 852 ± 208                    | 863 ± 374     |
|                              | 240 (3)         | 818 ± 78                     | 960 ± 314                    | 913 ± 3       |

**Table S3.** Bioluminescence values for the indicated strains and conditions. Number of biological replicates (2). nd = no data.

|                               | Time (min)  | Nitrogen source              |                              |             |
|-------------------------------|-------------|------------------------------|------------------------------|-------------|
|                               |             | NH <sub>4</sub> <sup>+</sup> | NO <sub>3</sub> <sup>-</sup> | -N          |
| PipX-NtcA ( <i>pipX</i> )     | Pre-culture |                              | 3429 ± 1017                  |             |
|                               | 0           | 956 ± 387                    | 1025 ± 610                   | 958 ± 249   |
|                               | 15          | 790 ± 8                      | 1026 ± 387                   | 856 ± 40    |
|                               | 30          | 3312 ± 3175                  | 7312 ± 9008                  | 9465 ± 1269 |
|                               | 45          | 5524 ± 146                   | 10182 ± 5896                 | 11421 ± 120 |
|                               | 60          | 3928 ± 4481                  | 4572 ± 1691                  | 8549 ± 5312 |
|                               | 120         | 3485 ± 1291                  | 2393 ± 1075                  | 4043 ± 760  |
|                               | 180         | 2600 ± 27                    | 3730 ± 528                   | 4468 ± 420  |
|                               | 240         | 4915 ± 241                   | 2747 ± 381                   | 2946 ± 964  |
|                               | 360         | 4853 ± 1882                  | 10736 ± 3764                 | 3091 ± 259  |
| PipX-NtcA ( <i>pipXglnB</i> ) | Pre-culture |                              | 4771 ± 440                   |             |
|                               | 0           | 690 ± 7                      | 860 ± 159                    | 712 ± 130   |
|                               | 15          | 958 ± 464                    | 1271 ± 654                   | 626 ± 40    |
|                               | 30          | 5283 ± 931                   | 11537 ± 745                  | 5190 ± 2632 |
|                               | 45          | 6759 ± 1802                  | 8939 ± 3514                  | 6183 ± 1961 |
|                               | 60          | 3892 ± 1657                  | 4828 ± 996                   | 9822 ± 4011 |
|                               | 120         | 4579 ± 925                   | 1506 ± 1230                  | 3564 ± 2592 |
|                               | 180         | 3546 ± 4143                  | 2649 ± 1978                  | 3533 ± 2578 |
|                               | 240         | 3318 ± 1164                  | 3157 ± 2067                  | 4538 ± 608  |
|                               | 360         | 2363 ± 1100                  | 13437 ± 251                  | 4415 ± 369  |

**Table S4.** Bioluminescence values for the indicated strains in the presence or absence of 200  $\mu$ M DCCD. Number of biological replicates are indicated (X).

|                              | Time (min) | -DCCD            | +DCCD              |
|------------------------------|------------|------------------|--------------------|
| PipX-P11 ( <i>pipXglnB</i> ) | 0          | 12755 $\pm$ 4028 | 12393 $\pm$ 2814   |
|                              | 5          | 10967 $\pm$ 2969 | 116980 $\pm$ 15137 |
|                              | 10         | 10057 $\pm$ 3919 | 149405 $\pm$ 16103 |
|                              | 15         | 9015 $\pm$ 3142  | 171105 $\pm$ 9677  |
|                              | 20         | 8956 $\pm$ 3010  | 121029 $\pm$ 38618 |
| PipX-NtcA ( <i>pipX</i> )    | 0          | 4402 $\pm$ 1451  | 4864 $\pm$ 865     |
|                              | 5          | 4262 $\pm$ 1793  | 1568 $\pm$ 509     |
|                              | 10         | 4311 $\pm$ 1966  | 657 $\pm$ 119      |
|                              | 15         | 4510 $\pm$ 1247  | 523 $\pm$ 40       |
|                              | 20         | 4770 $\pm$ 1451  | 400 $\pm$ 45       |

**Table S5.** Bioluminescence values for the indicated strains and conditions. Number of biological replicates are indicated (X). nd = no data.

|                                              | Time (min) | Nitrogen source              |                              |              |
|----------------------------------------------|------------|------------------------------|------------------------------|--------------|
|                                              |            | NH <sub>4</sub> <sup>+</sup> | NO <sub>3</sub> <sup>-</sup> | -N           |
| PipX-PII ( <i>pipXglnB</i> )                 | 0 (2)      | 24281 ± 7527                 | 22837 ± 8400                 | 23587 ± 5816 |
|                                              | 60 (2)     | 62194 ± 23344                | 27850 ± 12282                | 17449 ± 86   |
| PipX <sup>Y6A</sup> -PII ( <i>pipXglnB</i> ) | 0 (3)      | 1996 ± 627                   | 2687 ± 1434                  | 1653 ± 615   |
|                                              | 60 (3)     | 6374 ± 1476                  | 2032 ± 1173                  | 845 ± 189    |
| PipX-NtcA ( <i>pipX</i> )                    | 0 (3)      | 861 ± 35                     | 673 ± 218                    | 577 ± 139    |
|                                              | 60 (3)     | 4100 ± 2901                  | 4592 ± 1805                  | 8221 ± 4255  |
| PipX <sup>Y6A</sup> -NtcA ( <i>pipX</i> )    | 0 (3)      | 851 ± 96                     | 681 ± 40                     | 765 ± 83     |
|                                              | 60 (3)     | 710 ± 50                     | 940 ± 204                    | 867 ± 96     |
| PipX ( <i>pipX</i> )                         | 0 (2)      | 781 ± 38                     | 899 ± 331                    | 700 ± 107    |
|                                              | 60 (2)     | 433 ± 543                    | 825 ± 338                    | 1106 ± 567   |
