# Supplementary material for: Analysing the Cyanobacterial PipX Interaction Network Using NanoBiT Complementation in Synechococcus elongatus PCC7942
Source: MDPI journal article supplement (doi:10.3390/ijms25094702), 2024-04-25
Supplement: s1 [file s1]

**Table S1.** Oligonucleotides

| Name            | Sequence (5'-3')                                                                          |
|-----------------|-------------------------------------------------------------------------------------------|
| CS3-PipX-1F     | 5' TTCTGTATGGAACGGGCATGCTGCTAAAACTAGCCGCC 3'                                              |
| PipX-FL-1R      | 5' TCCTCCGCCGCCAGAAGATCCAGAACCGGTCGCTGCGGCA<br>GCAGATCTCAGAAAGTTTGTGTTGAAGACTTG 3'        |
| NSI-seq         | 5' GGAGGCTTGGCAGACC 3'                                                                    |
| FL-SmBit-NS1-2F | 5' GATCTTCTGGCGGCGGAGGAATGGTCACCGGCTACCGGCTGTT<br>CGAGGAAATCCTGTAGGATCCTCTAGAGTCGACCTC 3' |
| FL-SmBit-PII-3F | 5' GATCTTCTGGCGGCGGAGGAATGGTCACCGGCTACCGGCTGTTGAG<br>GAAATCCTGTAGTAACAGGTTGCCTGTCTAGCC 3' |
| PII-FL-LgBit-3R | 5' TCCGCTACTTCCGCCGCCTCCGCTGATTGCGTCGGCGTTTTTC 3'                                         |
| FL-LgBit-4F     | 5' CGGAGGCGGCGGAAGTAGCGGAGTGTTTACCCTGGAAGATTTC 3'                                         |
| LgBit-NS1-4R    | 5' GAGGTCGACTCTAGAGGATCTTAGCTGTTGATGGTCACTCT 3'                                           |
| SmBiT-PNtcA-F   | 5' ATGGTCACCGGCTACCGGCTGTTGAGGAAATCCTGTAGCCGCTGTTGGCTGCCTCC 3'                            |
| NtcA-FL-LgBit-R | 5' AAACACTCCGCTACTTCCGCCGCCTCCGCTGCTGAACTGCTGACTCAGCGC 3'                                 |
| SmBiT-2R        | 5' CTACAGGATTTCTCGAACAGCCGGTAGCCGGTG 3'                                                   |
| Y6A-2F          | 5' GCTTCCGAGAACGCCCTCAACCATCCC 3'                                                         |
| Y6A-2R          | 5' CATTACTCGGGGGAATCG 3'                                                                  |
| GlnB-1F         | 5' GGCTTAAGGAGAATTCCCTGAAGAAG 3'                                                          |
| GlnB-1R         | 5' AACTGCAGTCGACGCTGACTTAGATTGCGTCG 3'                                                    |
| NS1-2R          | 5' CGGCCGAAAATGACAAGATC 3'                                                                |
| NSI-1R          | 5' TGCCTGAAAGCGTGACGAGC 3'                                                                |
| PipX-126-F      | 5' TAAAACTAGCCGCCCTTGC 3'                                                                 |
| PipX-5R         | 5' CAGCCCGCAAATCAGCAG 3'                                                                  |
